# Supplementary material for: Pb Content, Risk Level and Primary-Source Apportionment in Wheat and Rice Grains in the Lihe River Watershed, Taihu Region, Eastern China
Source: MDPI journal article supplement (doi:10.3390/ijerph18126256), 2021-06-09
Supplement: s1 [file s1]

# Pb content, risk level and primary-source apportionment in wheat and rice grains in the Lihe River watershed, Taihu region

## Contents

**Figure S1.** Location of the study area and distribution of sampling points.

**Figure S2.** Relationships between  $^{207}\text{Pb}/^{206}\text{Pb}$  and  $^{208}\text{Pb}/^{206}\text{Pb}$  for soils and possible contamination sources. SM = suspended matter in irrigation water; filtered water = filtered irrigation water.

**Figure S3.** Pb isotopic ratios in dustfall and its Pb sources.

**Table S1.** Mean value of calculation parameters for daily average exposure of Pb

**Table S2.** Division of health risk grade.

**Table S3.** Values of physicochemical properties in wheat and rice soil.

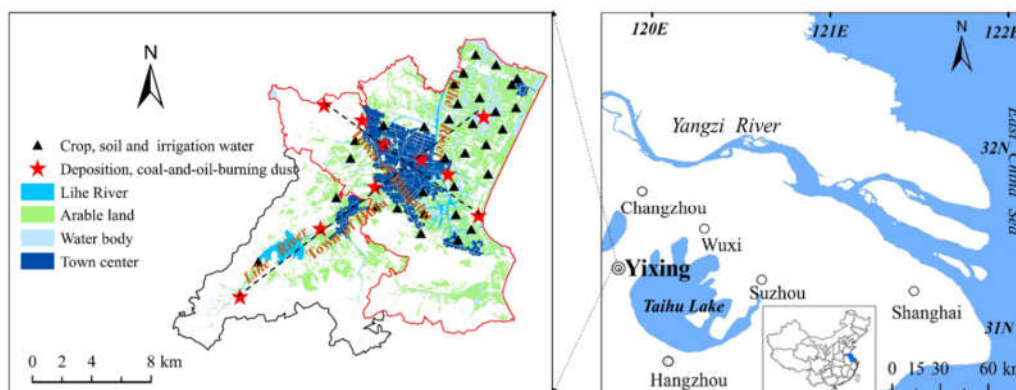

**Figure S1.** Location of the study area and distribution of sampling points.

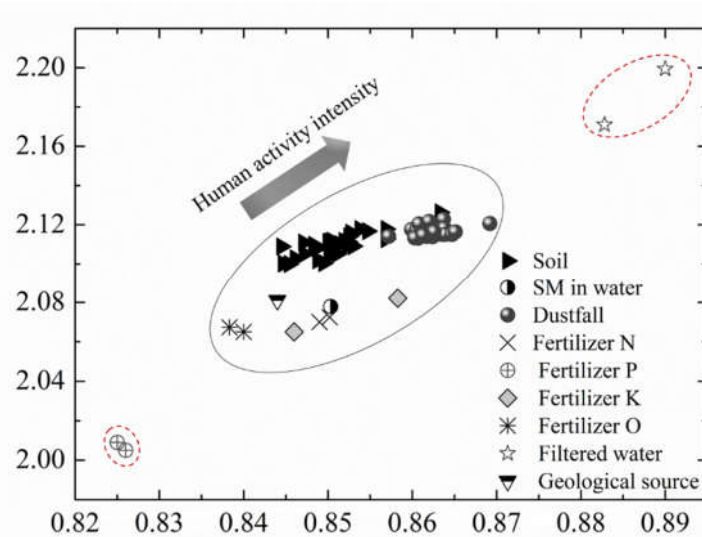

**Figure S2.** Relationships between  $^{207}\text{Pb}/^{206}\text{Pb}$  and  $^{208}\text{Pb}/^{206}\text{Pb}$  for soils and possible contamination sources. SM = suspended matter in irrigation water; filtered water = filtered irrigation water.

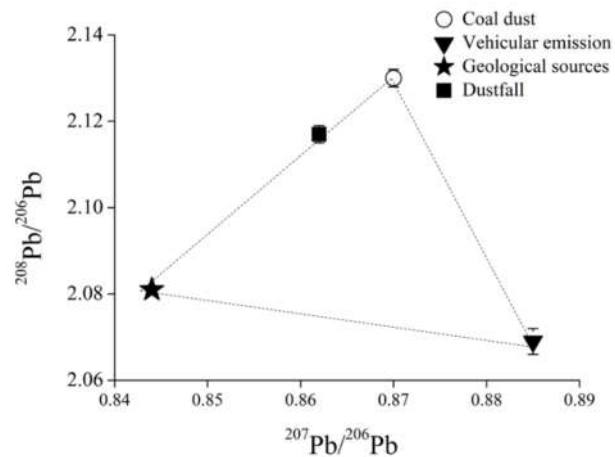

**Figure S3** Pb isotopic ratios in dustfall and its Pb sources.

**Table S1.** Mean value of calculation parameters for daily average exposure of Pb

| Parameter | Meaning                          | Unit                           | Child        | Adult        |
|-----------|----------------------------------|--------------------------------|--------------|--------------|
| $C_w$     | Pb concentration in wheat grains | $\text{mg}\cdot\text{kg}^{-1}$ | <b>0.539</b> | <b>0.539</b> |
| $C_r$     | Pb concentration in rice grains  | $\text{mg}\cdot\text{kg}^{-1}$ | <b>0.447</b> | <b>0.447</b> |
| BW        | Average bodyweight               | kg                             | <b>17.6</b>  | <b>67.6</b>  |
| EF        | Exposure frequency               | $\text{d}\cdot\text{a}^{-1}$   | 365          | 365          |

|                   |                         |                     |                    |                    |
|-------------------|-------------------------|---------------------|--------------------|--------------------|
| ED                | Exposure duration       | a                   | 6                  | 70                 |
| AT                | Average exposure time   | d                   | 365×ED             | 365×ED             |
| CF                | Unit conversion         | kg·mg <sup>-1</sup> | 1×10 <sup>-6</sup> | 1×10 <sup>-6</sup> |
| IngR <sub>w</sub> | Ingestion rate of wheat | mg·d <sup>-1</sup>  | <b>0.039</b>       | <b>0.101</b>       |
| IngR <sub>r</sub> | Ingestion rate of rice  | mg·d <sup>-1</sup>  | <b>0.091</b>       | <b>0.234</b>       |

Note: the data in bold are the results of interview survey or test, and other data are provided by US EPA.

**Table S2.** Division of health risk grade.

| Risk grade  | Low      | Medium-low  | Medium    | Next higher | high  |
|-------------|----------|-------------|-----------|-------------|-------|
| Range of HQ | 1<HQ≤1.5 | 1.5 < HQ≤ 2 | 2< HQ≤2.5 | 2.5 < HQ≤3  | 3< HQ |

**Table S3.** Values of physicochemical properties in wheat and rice soil.

| Soil properties              | Soil type  | Range       | Mean    | SD     | CV    |
|------------------------------|------------|-------------|---------|--------|-------|
| pH                           | Wheat soil | 4.85-7.45   | 5.81    | 0.69   | 11.88 |
|                              | Rice soil  | 4.99-7.59   | 6.00    | 0.76   | 12.61 |
| CEC (cmol·kg <sup>-1</sup> ) | Wheat soil | 11.76-22.99 | 18.41   | 2.60   | 14.11 |
|                              | Rice soil  | 14.78-23.79 | 18.31   | 2.88   | 15.74 |
| EC (μs·cm <sup>-1</sup> )    | Wheat soil | 672-3050    | 1592.25 | 648.13 | 40.71 |
|                              | Rice soil  | 695-4090    | 1934.78 | 866.24 | 44.77 |
| TOC                          | Wheat soil | 1.84-5.35   | 3.58    | 0.94   | 26.20 |
|                              | Rice soil  | 0.97-6.62   | 3.45    | 1.45   | 42.11 |
| Mean particle size           | Wheat soil | 8.45-52.06  | 24.37   | 8.37   | 34.41 |
|                              | Rice soil  | 7.46-29.25  | 17.73   | 5.41   | 30.54 |

Note: “SD” represent “standard deviation”; “CV” represent “coefficient of variation”.
